# Supplementary material
Source: Springer Nature journal article supplement (https://www.springermedizin.de/resource/supplementary/12974_2013_941_MOESM6_ESM.pdf/9600450)

gp91

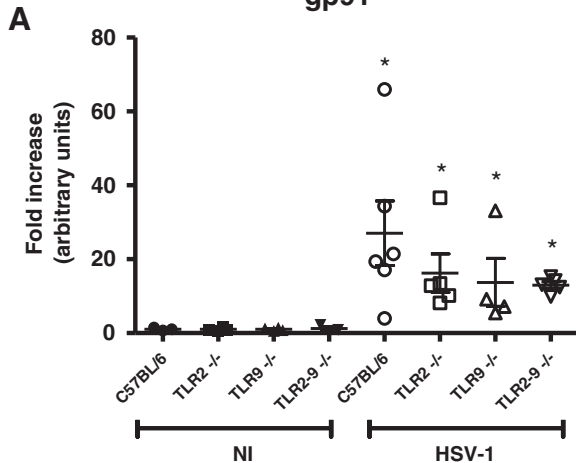

p22

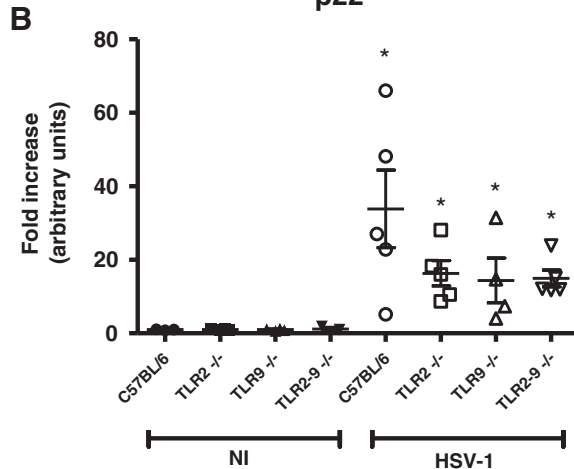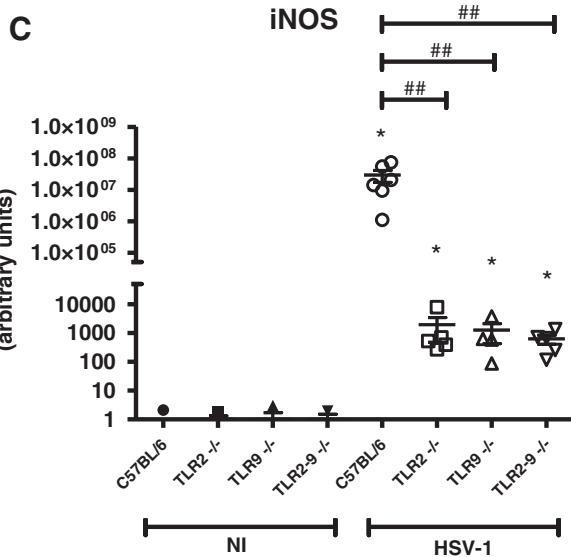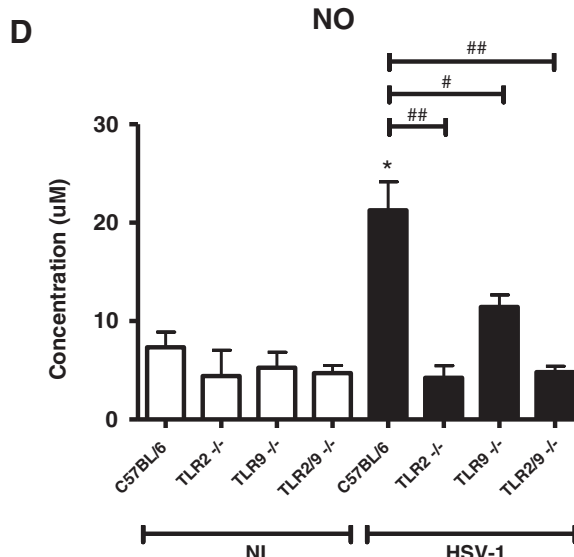

Supplement: MOESM6 [file 9600450]
